# Supplementary material for: Cloudy Apple Juice Fermented by Lactobacillus Prevents Obesity via Modulating Gut Microbiota and Protecting Intestinal Tract Health
Source: Nutrients. 2021 Mar 17;13(3):971. doi: 10.3390/nu13030971 (PMC8002442; doi:10.3390/nu13030971)
Supplement: Supplementary file 1 [file nutrients-13-00971-s001.pdf]

## Supplementary materials

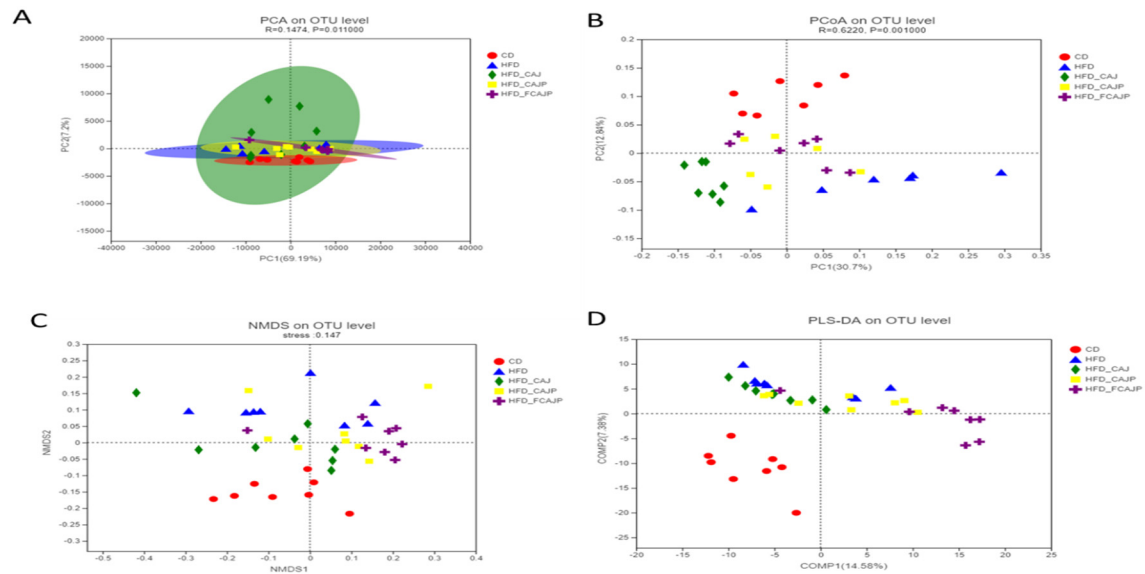

**Figure.S1.** Responses of the diversity, richness, and structure of the gut microbiota (n=8). **(A)** Principal Component Analysis (PCA) score plot **(B)** PCoA score plot analysis based on Unweighted-unifrac-full-tree; **(C)** Nonmetric multidimensional scaling (NMDS) score plot based on Spearman approx.; **(D)** Partial Least Squares Discriminant Analysis (PLS-DA) score plot. Note: CD: basal diet & Saline; HFD: 45% high-fat diet & Saline; HFD+CAJ: 45% high-fat diet & CAJ; HFD+CAJP: 45% high-fat diet & CAJP; HFD+FCAJP: 45% high-fat diet & FCAJP.

**Figure.S2.** Five groups comparison chart based on the community abundance at the phylum

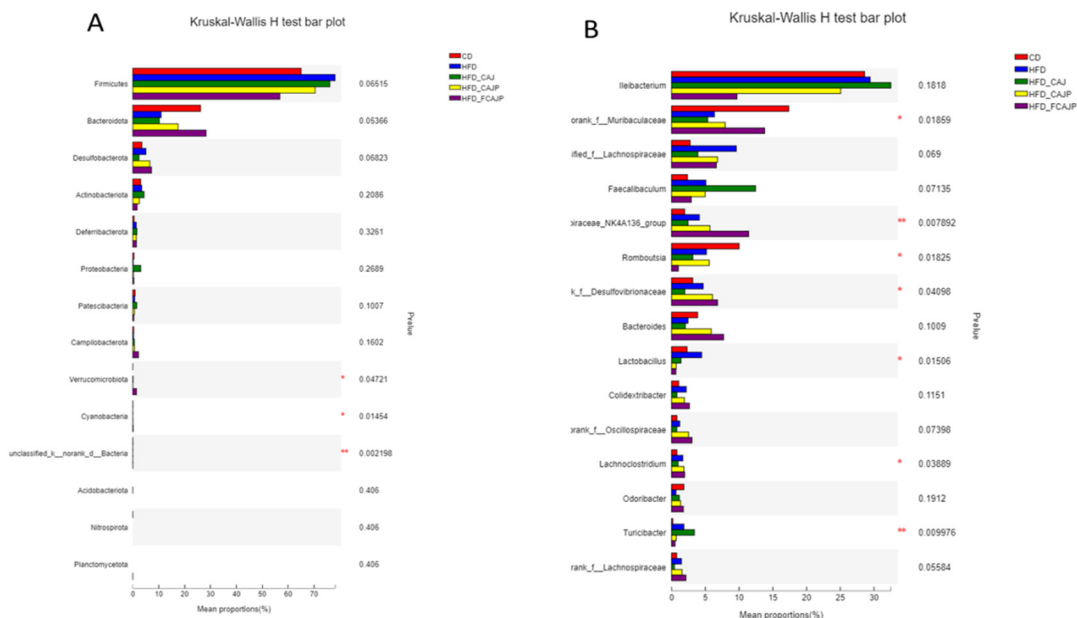

level and genus level (n=8). Note: CD: basal diet & Saline; HFD: 45% high-fat diet & Saline; HFD+CAJ: 45% high-fat diet & CAJ; HFD+CAJP: 45% high-fat diet & CAJP; HFD+FCAJP: 45% high-fat diet & FCAJP. Differences were assessed by Kruskal-Wallis H test and denoted as follows: \* $p < 0.05$  and \*\* $p < 0.01$  in a comparison between the two groups.

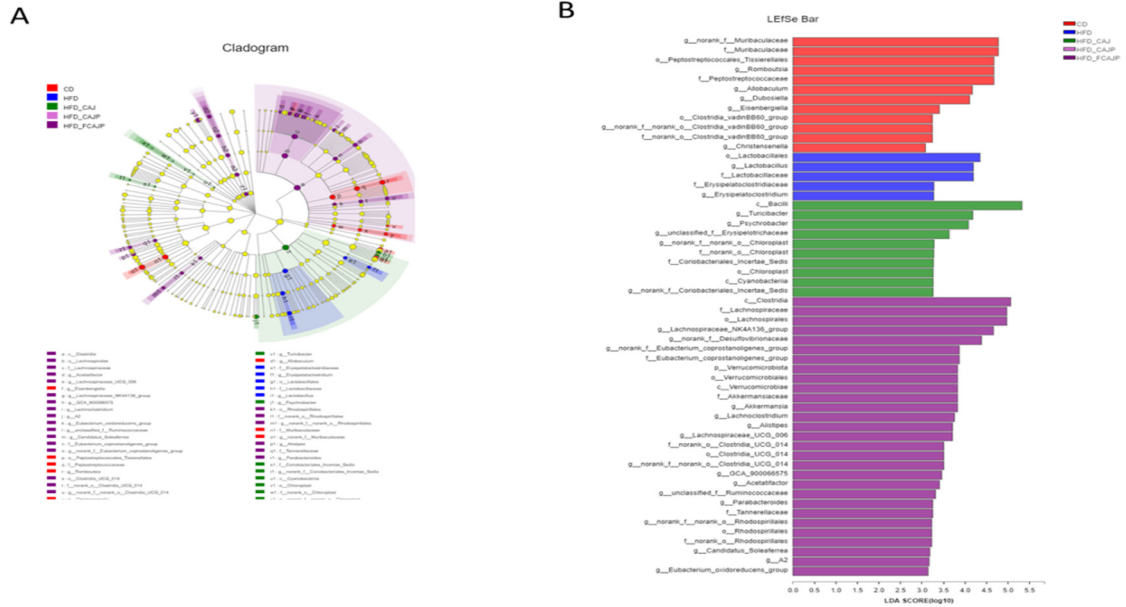

**Figure.S3.** LEfSe comparison of gut microbiota on groups (n=8). (A) LEfSe multi-level tree map. (B). Distribution histograms of five groups (LDA=3). Note: CD: basal diet & Saline; HFD: 45% high-fat diet & Saline; HFD+CAJ: 45% high-fat diet & CAJ; HFD+CAJP: 45% high-fat diet & CAJP; HFD+FCAJP: 45% high-fat diet & FCAJP.

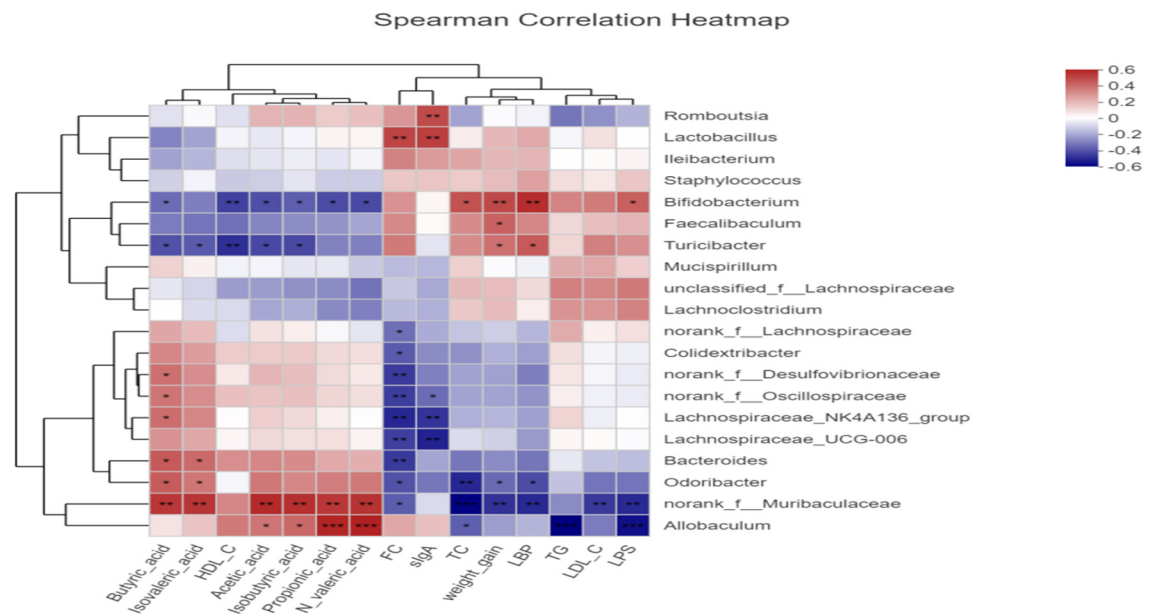

**Figure.S4** Spearman's correlation between the relative abundance of gut microbiota and other levels (n=8) \*p < 0.05 \*\*p < 0.01 and \*\*\*p < 0.001

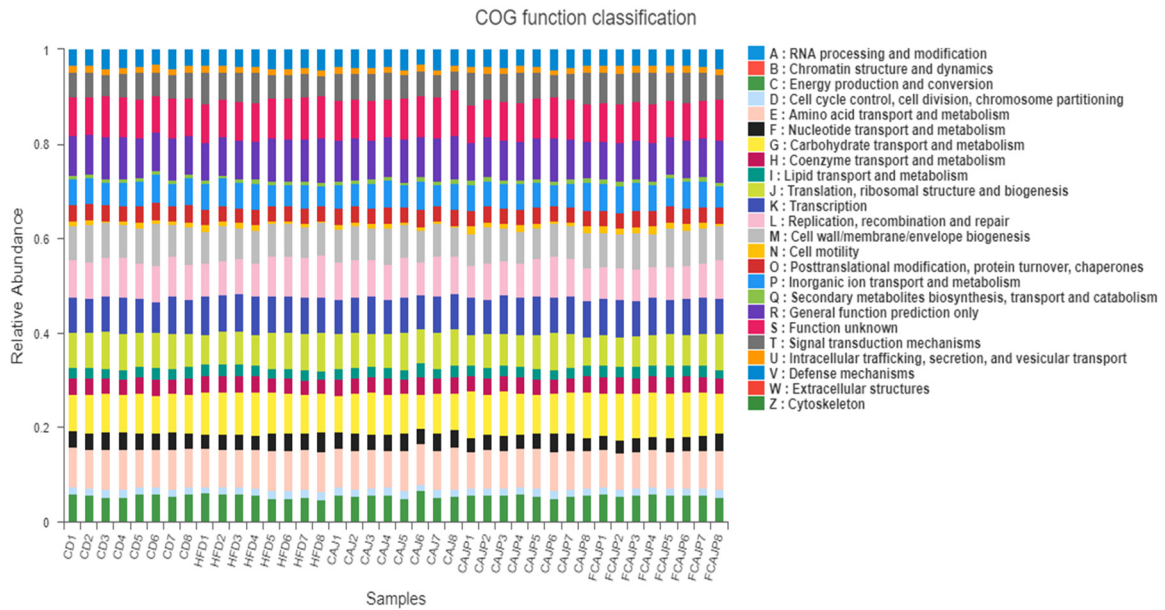

**Figure.S5** The abundances of KEGG pathways in the functional prediction by PICRUSt (n=8).

**Table S1** The composition of basal diet and 45% high-fat diet

| Ingredients (g/kg of diet) | basal diet (g/kg of diet) | 45% high-fat diet (g/kg of diet) |
|----------------------------|---------------------------|----------------------------------|
| Casein                     | 140                       | 175                              |
| Corn Starch                | 465.7                     | 132                              |
| Maltodextrin               | 155                       | 125                              |
| Sucrose                    | 100                       | 202                              |
| Soybean Oil                | 40                        | 30                               |
| Lard                       | —                         | 196                              |
| Cellulose                  | 50                        | 62                               |
| Mineral Mix, M1021         | 35.0                      | 61                               |
| Vitamin Mix, V1010         | 10                        | 12                               |
| L-Cystine                  | 1.8                       | 2                                |
| Choline Bitartrate         | —                         | 3                                |
| TBHQ                       | 0.036                     | 0.045                            |
| Choline Chloride           | 2.5                       | —                                |
| Total                      | 1000                      | 1000                             |

Note: "—" means no the substance

**Table2** Daily intake of polyphenols of a mouse in five groups (μg/25g weight of a mouse).

| Polyphenols           | CD | HFD | HFD+CAJ       | HFD+CAJP      | HFD+FCAJP      |
|-----------------------|----|-----|---------------|---------------|----------------|
| Gallic acid           | —  | —   | 0.383±0.007a  | 0.571±0.004b  | 1.668±0.013c   |
| Isoferulic acid       | —  | —   | 0.060±0.002a  | 0.574±0.012b  | 0.749±0.014c   |
| Ellagic acid          | —  | —   | 1.032±0.013a  | 0.935±0.011b  | 1.064±0.012a   |
| P-hydroxybenzoic acid | —  | —   | 0.039±0.001a  | 0.053±0.001a  | 0.089±0.004b   |
| Ferulic acid          | —  | —   | 0.204±0.011a  | 0.164±0.003b  | 0.169±0.009b   |
| Cinnamic acid         | —  | —   | 0.428±0.012a  | 3.690±0.013b  | 4.255±0.017c   |
| Chlorogenic acid      | —  | —   | 53.996±1.014a | 49.583±1.003b | 51.840±1.109ab |
| Proanthocyanidin C1   | —  | —   | 0.414±0.021a  | 0.330±0.014a  | 0.922±0.005b   |
| Catechins             | —  | —   | 0.844±0.015a  | 1.182±0.012b  | 1.607±0.005c   |
| Rutin                 | —  | —   | 0.047±0.002a  | 1.111±0.019b  | 0.590±0.002c   |

|             |   |   |               |               |              |
|-------------|---|---|---------------|---------------|--------------|
| Cypridin    | — | — | 0.551±0.011a  | 2.210±0.101b  | 2.428±0.016b |
| Epicatechin | — | — | 11.886±0.304a | 12.510±0.207b | 9.891±1.308c |

Note: "—" means no the substance; in each column mean  $\pm$  SD value (n = 3 represents the polyphenols in cloudy apple juices were determined in triplicate) bearing different letters differ significantly ( $p < 0.05$ ) between different groups. Note: CD: basal diet & Saline; HFD: 45% high-fat diet & Saline; HFD+CAJ: 45% high-fat diet & CAJ; HFD+CAJP: 45% high-fat diet & CAJP; HFD+ FCAJP: 45% high-fat diet & FCAJP.
